# Supplementary material for: Genotype-Environment Interactions Reveal Causal Pathways That Mediate Genetic Effects on Phenotype
Source: PLOS journal article supplement (doi:10.1371/journal.pgen.1003803), 2013-09-19

validation rate

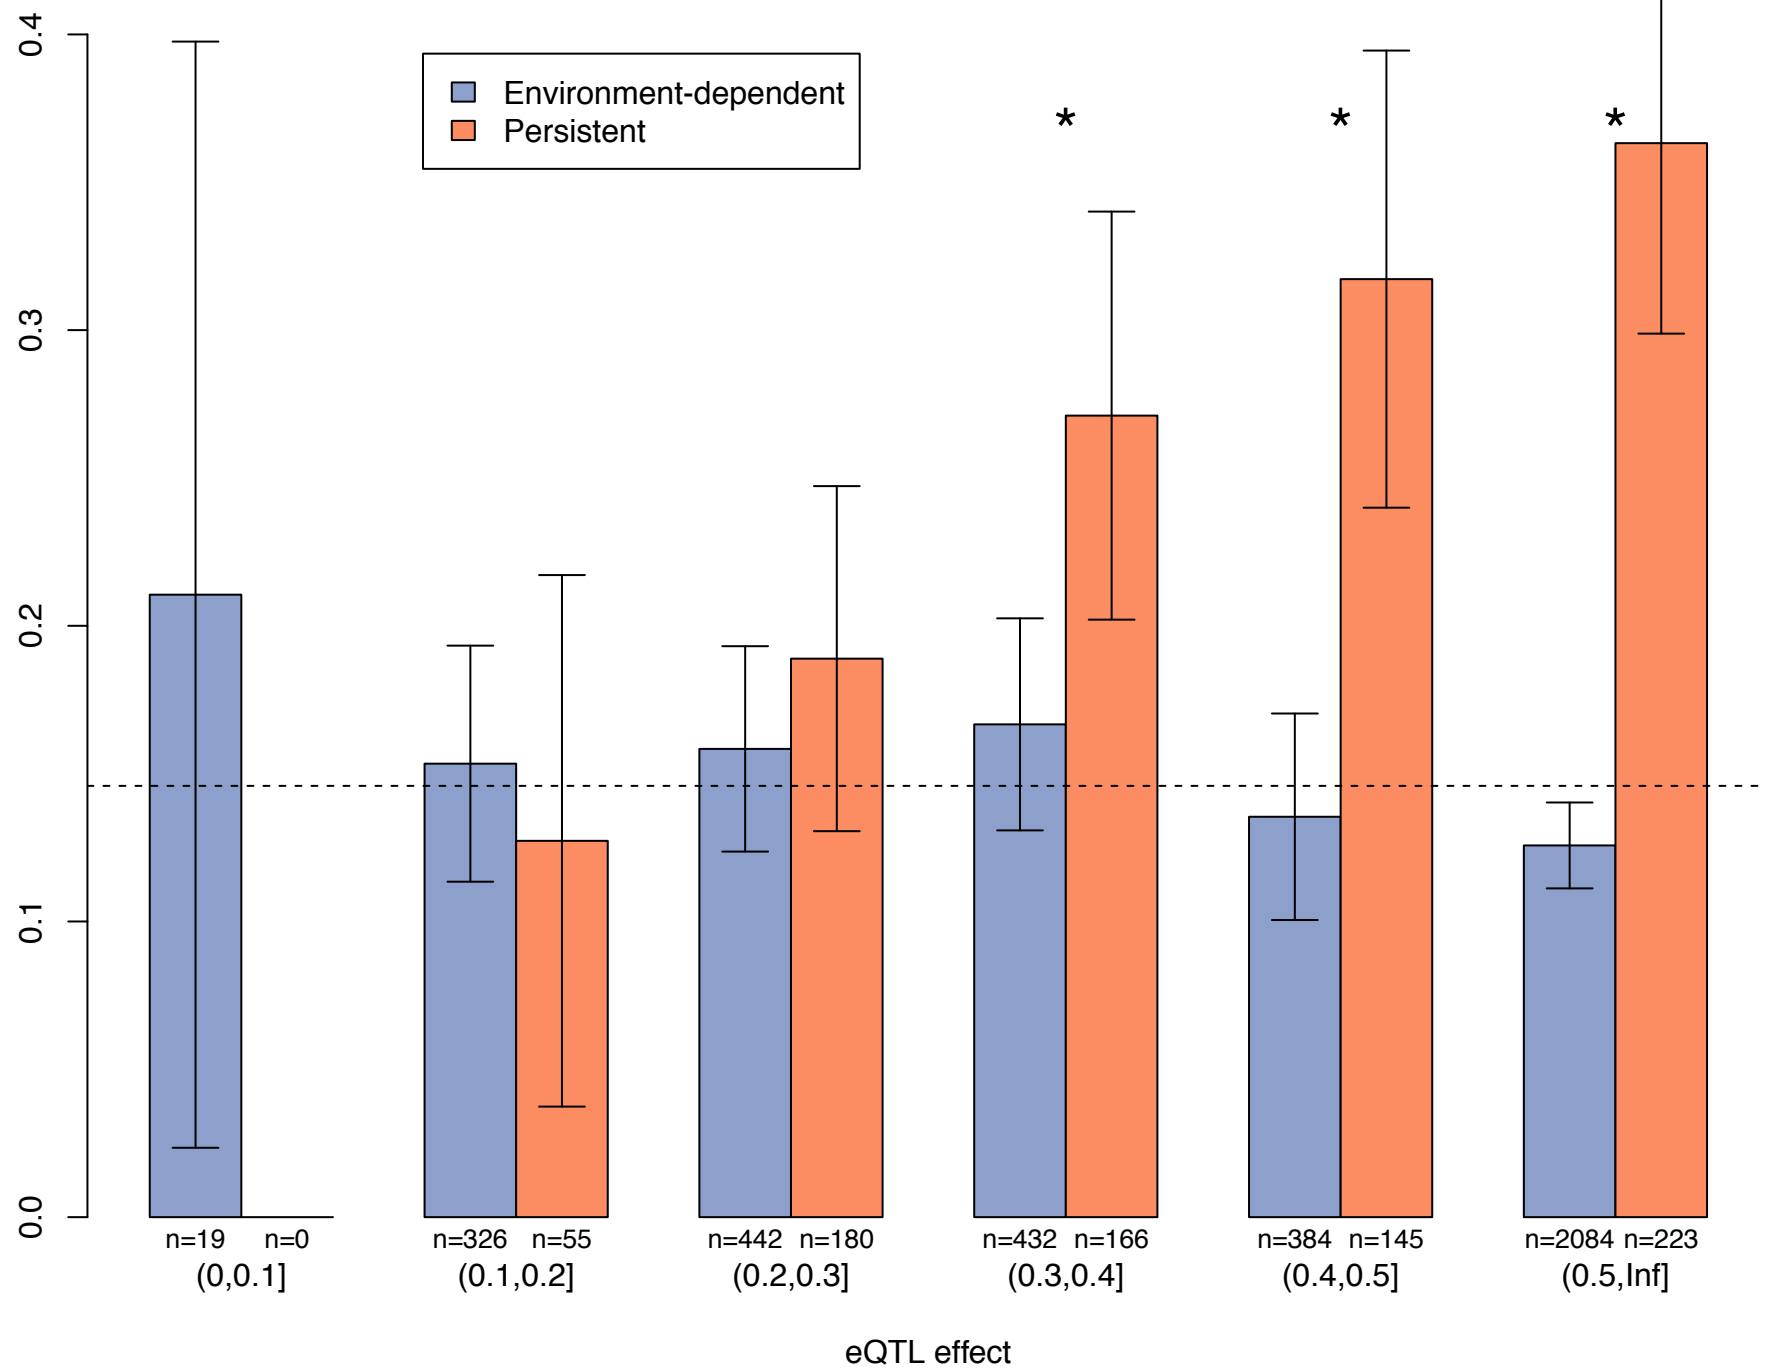

Supplement: S9 (10.1371/journal.pgen.1003803.s009) [file journal.pgen.1003803.s009]
